# Supplementary material
Source: publisher site journal article supplement (https://www.dovepress.com/article/548520)
Supplement: Supplementary file 1 [file supplemental%20tables.docx]

**SUPPLEMENTAAL TABLES**

**SUPPLEMENTARY Table 1 S1:** Histological analysis comparing cNAS to Bald Zones in patients with concomitant biopsies of the cNAS and Bald zones who showed PIILIF

|  | *Balding site  N = 18 | *cNAS  N = 18 | **P Value |
| --- | --- | --- | --- |
| Perifollicular changes *infundibulo-Isthmic*  *(upper follicle above arrector pili insertion)*    Lymphocytes  Plasma cells  Lymphohistiocytes  Neutrophils  Fibrosis | 18 (100%)  2 (11%)  0 (0%)  0 (0%)  18 (100%) | 17 (94%)  0 (0%)  0 (0%)  0 (0%)  18 (100%) | >0.9  0.5  >0.9  >0.9  >0.9 |
| Perifollicular changes, *bulbar*  (lower follicle, hair bulb region)  Lymphocytes  Plasma cells  Lymphohistiocytes  Neutrophils  Fibrosis | 6 (33%)  0 (0%)  0 (0%)  0 (0%)  0 (0%) | 6 (33%)  0 (0%)  0 (0%)  0 (0%)  0 (0%) | >0.9  >0.9  >0.9  >0.9  >0.9 |
| Root sheath desquamation    With inflammation  Without Inflammation | 0 (0%)  20 (110%) | 20 (110%)  05 (280%) | >0.9  >**0.045**9 |
| Complete absence of sebaceous glands | 2 (11%) | 3 (17%) | >0.9 |
| Epithelial changes    Squamatized basal layer  Max Josef Spaces  Interfollicular changes, lichen planus | 3 (17%)  6 (33%)  0 (0%) | 4 (22%)  7 (39%)  0 (0%) | >0.9  >0.7  >0.9 |
| *Vellus hair absence* | 13 (72%) | 10 (56%) | 0.3 |
| *Anagen: Telogen-catagen Ratio - mean (SD)* | 12 (10) | 6 (9) | 0.03 |
| *Number of vellus hairs Mean (SD)* | 0.9 (2.4) | 0.7 (1.1) | 0.3 |
| ****Terminal hair: Vellus hair Ratio (SD)* | 6.3 (3.4) | 10.5 (8.0) | 0.051 |

NOTES: Infundibulum/isthmus defined as the upper follicle from the ostium to the arrector pili insertion. Bulbar region defined as the lower follicle including the suprabulbar segment and hair bulb

*Mean (SD); n (%)

** P values for continuous variables were calculated using the Wilcoxon rank-sum test; p values for categorical variables were obtained using Pearson’s chi-square test. Raw p-values were adjusted for type I error using the step-up Hochberg procedure for expected low frequencies.

***Prespecified continuity‑corrected ratio (T+1)/(V+1)(T+1)/(V+1)(T+1)/(V+1) was used as the primary morphometric descriptor to accommodate zero‑vellus biopsies and standardize comparisons across zones

AGA: Androgenetic alopecia, cNAS: Non-alopecic scalp, PIILIF: Perifollicular Infundibulo-isthmic lymphocytic infiltrates and fibrosis,

**Supplemental Table S2**:Histological analysis comparing cNAS to Bald Zones in patients with concomitant biopsies of the cNAS and Bald zones who showed AGA-Only

|  | 1.*AGA in NAS with matched Bald Area Biopsy  N=3 | 2.*Bald Area Biopsy of #1 Patients  N=3 | 3. *cNAS of all AGA-ONLY biopsies   N = 23 | **P Value of #1 vs #2 | **P Value of #1 vs #3 |
| --- | --- | --- | --- | --- | --- |
| Perifollicular changes  *infundibulo-Isthmal*  Lymphocytes  Plasma cells  Lymphohistiocytes  Neutrophils  Fibrosis | 0 (0%)  0 (0%)  0 (0%)  1 (33%)  0 (0%) | 0 (0%)  0 (0%)  0 (0%)  0 (0%)  0 (0%) | 1 (4.3%)  0 (0%)  0 (0%)  0 (0%)  0 (0%) | >0.9  >0.9  >0.9  >0.9  >0.9 | >0.9  >0.9  >0.9  >0.9  >0.9 |
| Perifollicular changes, *bulbar*  Lymphocytes  Plasma cells  Lymphohistiocytes  Neutrophils | 0 (0%)  0 (0%)  0 (0%)  0 (0%) | 0 (0%)  0 (0%)  0 (0%)  0 (0%) | 0 (0%)  0 (0%)  0 (0%)  0 (0%) | >0.9  >0.9  >0.9  >0.9 | >0.9  >0.9  >0.9  >0.9 |
| Root sheath desquamation  With inflammation  Without Inflammation | 0 (0%)  0 (0%) | 0 (0%)  0 (0%) | 0 (0%)  0 (0%) | >0.9  >0.9 | >0.9  >0.9 |
| Complete absence of sebaceous glands | 0 (0%) | 0 (0%) | 0 (0%) | >0.9 | >0.9 |
| Outside follicular zones/ interfollicular area  Lymphocytes  Plasma cells  Lymphohistiocytes  Neutrophils | 0 (0%)  0 (0%)  0 (0%)  0 (0%) | 0 (0%)  0 (0%)  0 (0%)  0 (0%) | 0 (0%)  0 (0%)  0 (0%)  0 (0%) | >0.9  >0.9  >0.9  >0.9 | >0.9  >0.9  >0.9  >0.9 |
| Granulomatous Changes | 0 (0%) | 0 (0%) | 0 (0%) | >0.9 | >0.9 |
| Released Follicles | 0 (0%) | 0 (0%) | 0 (0%) | >0.9 | >0.9 |
| Epithelial changes       Squamatized basal layer     Max Josef Spaces  Interfollicular changes, lichen planus | 0 (0%)  0 (0%)  0 (0%) | 0 (0%)  0 (0%)  0 (0%) | 0 (0%)  0 (0%)  0 (0%) | >0.9  >0.9  >0.9 | >0.9  >0.9  >0.9 |
| *Vellus / Miniaturized hair absence* | 1(33%) | 0 (0%) | 8 (36%) | >0.9 | 0.5 |
| *Anagen: Telogen-catagen Ratio* | 11.3 (12.0) | 1.4 (0.4) | 3.7 (6.7) | >0.9 | >0.9 |
| *Number of vellus hairs* | 1.00 (1.00) | 1.33 (0.58) | 1.30 (1.40) | >0.9 | >0.9 |
|  |  |  |  |  |  |

 Notes; Infundibulum/isthmus defined as the upper follicle from the ostium to the arrector pili insertion. Bulbar region defined as the lower follicle including the suprabulbar segment and hair bulb;

| *n (%); Mean (SD) |
| --- |
| ** P values for continuous variables were calculated using the Wilcoxon rank-sum test; p values for categorical variables were obtained using Pearson’s chi-square test.. Raw p-values were adjusted for type I error using the step-up Hochberg procedure for expected low frequencies. |

AGA: Androgenetic alopecia, cNAS: Clinically Normal appearing scalp, PIILIF: Perifollicular Infundibulo-isthmic lymphocytic infiltrates and fibrosis,

**Supplemental Table S3.** Comparison of PIILIF in the normal-appearing scalp (NAS) of patients with androgenetic alopecia (AGA) in the current study cohort versus PIILIF in the NAS of patients with acne keloidalis nuchae (AKN) from a previously published cohort. AKN cohort data were adapted from: Umar S, Ton D, Carter MJ, Shitabata P. Unveiling a shared precursor condition for acne keloidalis nuchae and primary cicatricial alopecias. Clin Cosmet Investig Dermatol. 2023;16:2315–2327. https://doi.org/10.2147/CCID.S424135. Licensed under CC BY-NC (Creative Commons Attribution–NonCommercial 4.0 International License).16

|  | *PIILIF in cNAS of AGA STUDY cohort  N = 100 | *PIILIF in NAS of AKN STUDY cohort  N = 23 | **P |
| --- | --- | --- | --- |
| Perifollicular changes  *infundibulo-Isthmal*  Lymphocytes  Plasma cells  Lymphohistiocytes  Neutrophils  Fibrosis | 92 (92%)  20(20%)  0 (0%)  0 (0%)  99 (99%) | 22 (92%)  12 (50%)  0 (0%)  0 (0%)  23 (100) | >0.9  0.003  >0.9  >0.9  >0.9 |
| Perifollicular changes, *bulbar*  Lymphocytes  Plasma cells  Lymphohistiocytes  Neutrophils | 20 (20%)  5 (5.0%)  0 (0%)  0 (0%) | 0 (0%)  0 (0%)  0 (%)  0 (0%) | 0.013  0.6  >0.9  0.2 |
| Root sheath desquamation  With inflammation  Without Inflammation | 25 (25%)  38 (38%) | 13 (57%)  5 (22%) | 0.003  0.14 |
| Complete absence of sebaceous glands | 8 (8.2%) | 10 (45%) | <0.001 |
| Outside follicular zones/ interfollicular area  Lymphocytes  Plasma cells  Lymphohistiocytes  Neutrophils | 20 (20%)  4 (4.0%)  1 (1.0%)  0 (0%) | 1 (4.3%)  1 (4.3%)  0 (0%)  0 (0%) | 0.12  >0.9  >0.9  >0.9 |
| Granulomatous Changes | 0 (0%) | 0 (0%) | >0.9 |
| Released Follicles | 0 (0%) | 1 (4.3%) | 0.2 |
| Epithelial changes  Squamatized basal layer  Max Josef Spaces  Interfollicular changes, lichen planus | 26 (27%)  31 (32%)  0 (0%) | 16 (73%)  17 (77%)  0 (0%) | <0.001  <0.001  >0.9 |
| *Vellus/Miniaturized hair presence* | 43 (42%) | 1(4.3%) | <0.001 |
| *Anagen: Telogen-catagen Ratio - mean (SD)* | 4.1 (5.7) | 4.8 (6.4) | >0.9 |
| *Number of vellus hairs*  *Mean (SD)* | 0.90 (1.37) Patients are all bald with miniaturization of AGA | 0.19 (0.60) | 0.022 |

 Notes; Infundibulum/isthmus defined as the upper follicle from the ostium to the arrector pili insertion. Bulbar region defined as the lower follicle including the suprabulbar segment and hair bulb

*n (%); Mean (SD)

** P values for continuous variables were calculated using the Wilcoxon rank-sum test; p values for categorical variables were obtained using Pearson’s chi-square test.. Raw p-values were adjusted for type I error using the step-up Hochberg procedure for expected low frequencies.

AGA: Androgenetic alopecia, cNAS: Clinically Normal appearing scalp, PIILIF: Perifollicular Infundibulo-isthmic lymphocytic infiltrates and fibrosis, AKN: Acne keloidalis nuchae

**Supplemental Table S4:** Comparison between AGA and PIILIF using the Immunohistochemistry data set of 17 patients

| Variable | N | **PIILIF in Bald Zone, N = 5 | **PIILIF in NAS, N = 12 | ***p-value |
| --- | --- | --- | --- | --- |
| *CD4      2      3 | 17 | 0 (0%)  5 (100%) | 0 (0%)  12 (100%) | >0.9 |
| *CD8      1      Trace | 17 | 5 (100%)  0 (0%) | 10 (83%)  2 (17%) | >0.9 |
| *CD117      1      2      3 | 17 | 1 (20%)  0 (0%)  4 (80%) | 0 (0%)  8 (67%)  4 (33%) | 0.2 |
| *Test      Demodex      Pityrosporum | 7 | 0 (0%)  2 (100%) | 1 (20%)  4 (80%) | >0.9 |

*% of total lymphocytes: Trace = 0-25%; 1 = 25-50%; 2 = 50-75%; 3 = 75-100%

| **n (%) |
| --- |
| ***Fisher’s exact test; Pearson’s Chi-squared test; Wilcoxon rank sum test; Two Sample t-test, Raw p-values were adjusted for type I error using the step-up Hochberg procedure for expected low frequencies. |

 AGA: Androgenetic alopecia, cNAS: Clinically Normal appearing scalp, PIILIF: Perifollicular Infundibulo-isthmic lymphocytic infiltrates and fibrosis

**Supplemental Table S5**: Comparison between PIILIF and AKN using the Immunohistochemistry data set of 15 patients

| Variable | N | **AKN Specimen, N = 3 | **PIILIF in cNAS of AGA, N = 12 | ***p-value |
| --- | --- | --- | --- | --- |
| *CD4      2      3 | 15 | 3 (100%)  0 (0%) | 0 (0%)  12 (100%) | 0.009 |
| *CD8      1      Trace | 15 | 3 (100%)  0 (0%) | 10 (83%)  2 (17%) | >0.9 |
| *CD117      1      2      3 | 15 | 2 (67%)  1 (33%)  0 (0%) | 0 (0%)  8 (67%)  4 (33%) | 0.075 |
| *Test      Demodex      Pityrosporum | 5 | 0 (NA%)  0 (NA%) | 1 (20%)  4 (80%) | >0.9 |

*% of total lymphocytes: Trace = 0-25%; 1 = 25-50%; 2 = 50-75%; 3 = 75-100%

| **n (%) |
| --- |
| ***Fisher’s exact test; Pearson’s Chi-squared test; Wilcoxon rank sum test; Two Sample t-test, Raw p-values were adjusted for type I error using the step-up Hochberg procedure for expected low frequencies. |

 AGA: Androgenetic alopecia, cNAS: Clinically Normal appearing scalp, PIILIF: Perifollicular Infundibulo-isthmic lymphocytic infiltrates and fibrosis, AKN: Acne keloidalis nuchae
